# Supplementary material for: The cellular composition of lymph nodes in the earliest phase of inflammatory arthritis
Source: PubMed Central journal article supplement — Ann Rheum Dis. 2013 May 9;72(8):1420–4. doi: 10.1136/annrheumdis-2012-202990 (PMC3711496; doi:10.1136/annrheumdis-2012-202990), 2013-05-09
Supplement: annrheumdis-2012-202990-s1.pdf [file annrheumdis-2012-202990-s1.pdf]

**Supplementary table S1. Characterisation of autoantibody-positive individuals**

In addition to table 1 characteristics are described which have previously been shown to be associated with the development of arthritis in autoantibody-positive individuals. RA= rheumatoid arthritis

\* Missing from 1 individual \*\* Ever smoked > 0 pack years; BMI= body mass index; VAS= visual analogue scale (range 0-100mm)

| <b>Characteristic</b>                      | <b>At risk individuals</b><br><b>N= 13</b> |
|--------------------------------------------|--------------------------------------------|
| First degree relative with RA* (n (%))     | 4 (36)                                     |
| Smoking history, ever** (n (%))            | 7 (54)                                     |
| Alcohol use (n (%))                        | 6 (46)                                     |
| BMI $\geq 25$ kg/m <sup>2</sup> (n (%))    | 4 (31)                                     |
| VAS pain (mm) (median (IQR))               | 23 (8-52)                                  |
| Morning stiffness (minutes) (median (IQR)) | 10 (0-38)                                  |
